# Supplementary material
Source: MDPI journal article supplement (https://www.mdpi.com/2304-6740/2/3/524)

# Supplementary Information

## 1. Powder X-ray Diffraction Measurements

**Figure S1.** Diffractogram with Rietveld fitting for compound **1**. Red, Experimental data of X-ray powder diffractometry of compound **1**; Blue, Diffractogram simulated from single crystal X-ray determination; Green, Rietveld fitting.

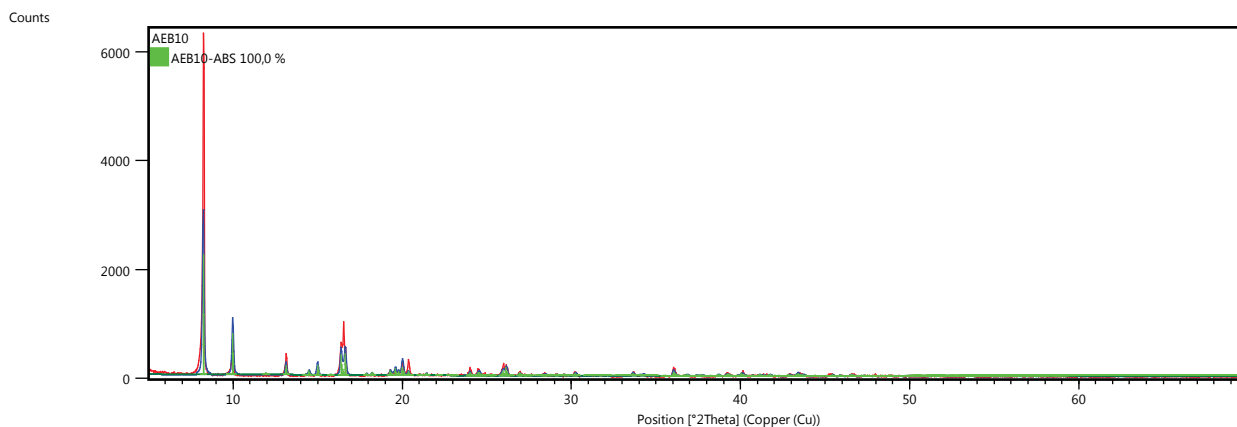

**Figure S2.** Diffractogram with Rietveld fitting for compound **2**. Red, Experimental data of X-ray powder diffractometry of compound **2**; Blue, Diffractogram simulated from single crystal X-ray determination; Green, Rietveld fitting.

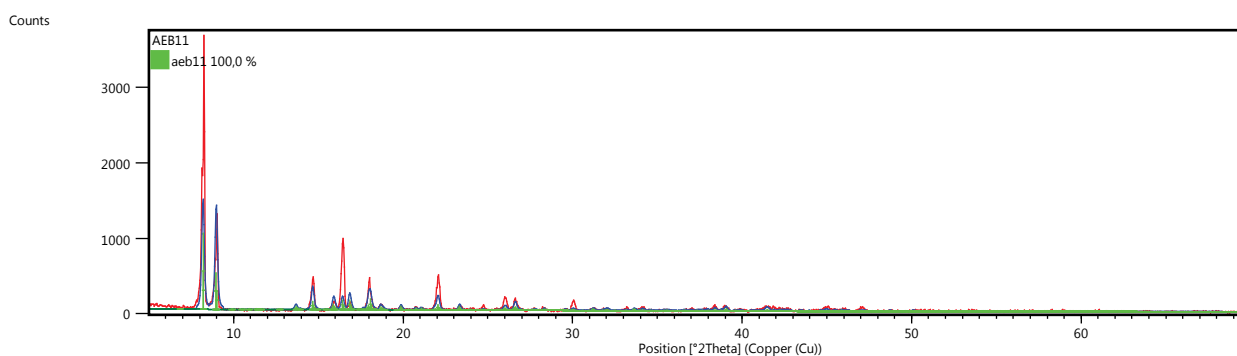

**Figure S3.** Diffractogram with Rietveld fitting for compound **3**. Red, Experimental data of X-ray powder diffractometry of compound **3**; Blue, Diffractogram simulated from single crystal X-ray determination; Green, Rietveld fitting.

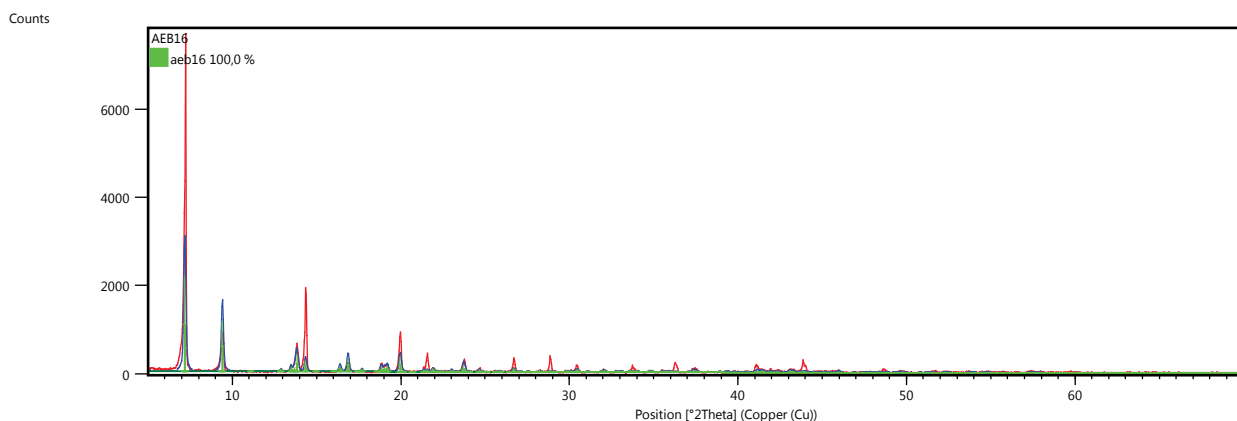

## 2. Infrared Spectra

**Figure S4.** IR spectrum of compound 1.

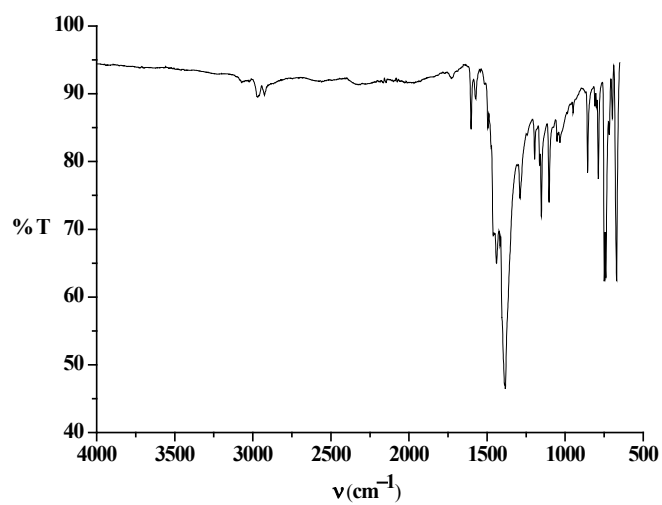

**Figure S5.** IR spectrum of compound 2.

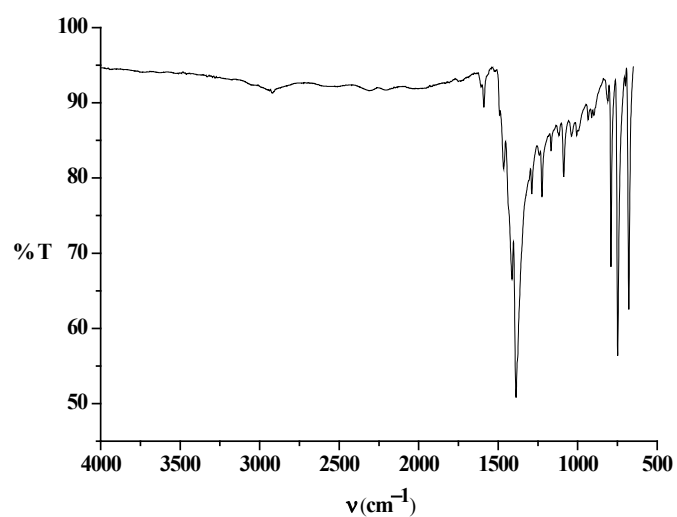

**Figure S6.** IR spectrum of compound 3.

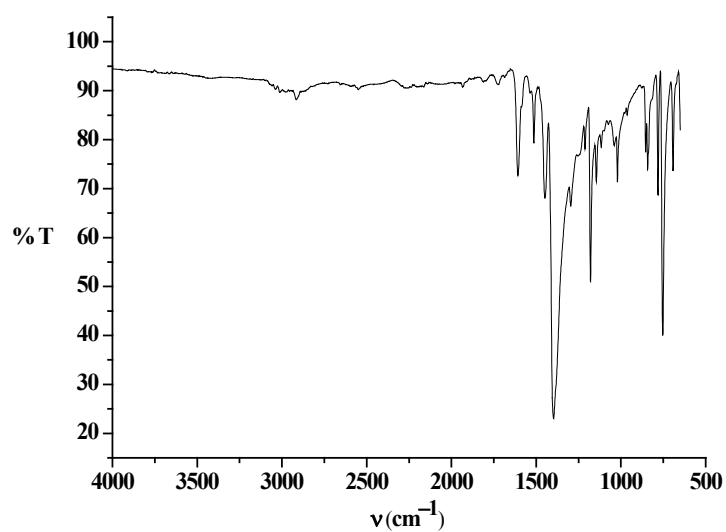

### 3. Electronic Spectra Data

**Figure S7.** Electronic spectra of compounds **1–3** measured by diffuse reflectance. The reflectance data were treated with Kubelka-Munk correction.

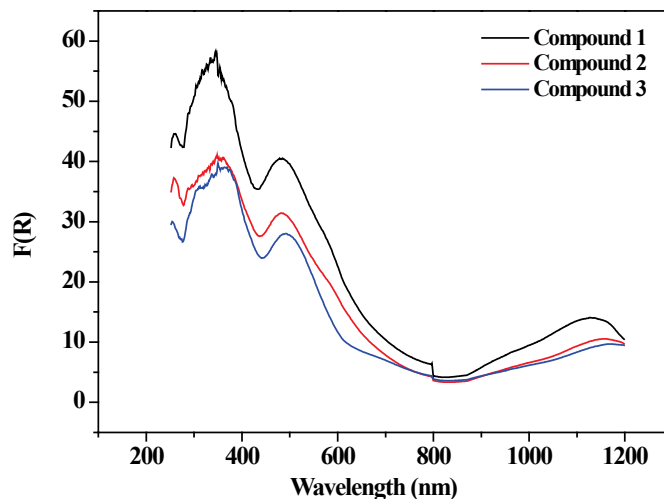

### 4. Magnetic Model

The model of Cukiernick *et al.* [31] takes into account the existence of a zero field splitting ( $D$ ), a weak antiferromagnetic coupling ( $zJ'$ ) between the dimetallic units, a temperature independent paramagnetism ( $TIP$ ) and a paramagnetic impurity ( $P$ ) of a mononuclear complex of Ru(III) with  $S = 1/2$ . The zero field splitting effect on the susceptibility can be quantified by considering the Hamiltonian  $H_D = S \cdot D \cdot S$ . The perturbation of a weak antiferromagnetic coupling over the zero field splitting system can be considered by using the molecular field approximation. Thus, for an  $S = 3/2$  spin system the magnetic susceptibility can be expressed as:

$$\chi' = \frac{\chi'_M}{1 - \chi'_M \left( \frac{2zJ'}{Ng^2\beta^2} \right)} \quad (1)$$

where  $\chi'_M$  includes the TIP

$$\chi'_M = \chi_M + TIP \quad (2)$$

and  $\chi_M$  considers the zero-field splitting in the parallel and perpendicular component as

$$\chi_M = \frac{\chi_{\parallel} + 2\chi_{\perp}}{3} \quad (3)$$

$$\chi_{\parallel} = \frac{Ng^2\beta^2}{kT} \left[ \frac{1 + 9e^{-2D/kT}}{4(1 + e^{-2D/kT})} \right] \quad (4)$$

$$\chi_{\perp} = \frac{Ng^2\beta^2}{kT} \left[ \frac{4 + \left( \frac{3kT}{D} \right) (1 - e^{-2D/kT})}{4(1 + e^{-2D/kT})} \right] \quad (5)$$

Finally, the consideration of the paramagnetic impurity ( $P$ ) leads to the expression

$$\chi'_{mol} = (1 - P)\chi' + P \frac{N\beta^2 g^2}{4kT} \quad (6)$$

**Figure S8.** Temperature dependence of the molar susceptibility  $\chi_M$  ( $\circ$ ) and  $\mu_{\text{eff}}$  ( $\Delta$ ) for complex **2**; solid lines are the product of a least-squares fit to the model indicated in the text.

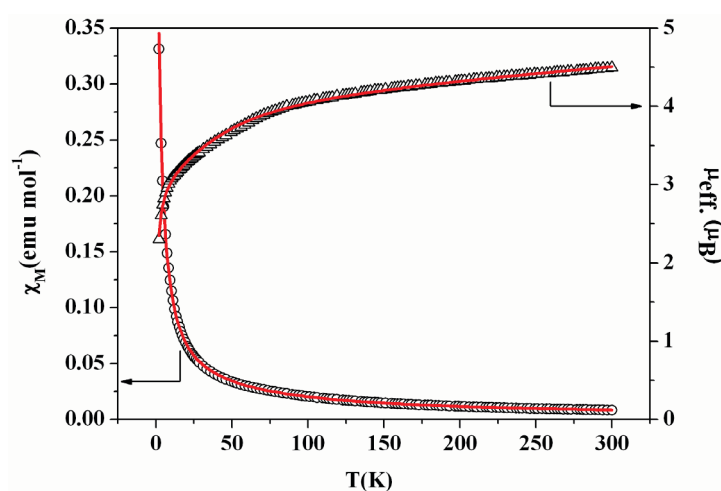

**Figure S9.** Temperature dependence of the molar susceptibility  $\chi_M$  ( $\circ$ ) and  $\mu_{\text{eff}}$  ( $\Delta$ ) for complex **3**; solid lines are the product of a least-squares fit to the model indicated in the text.

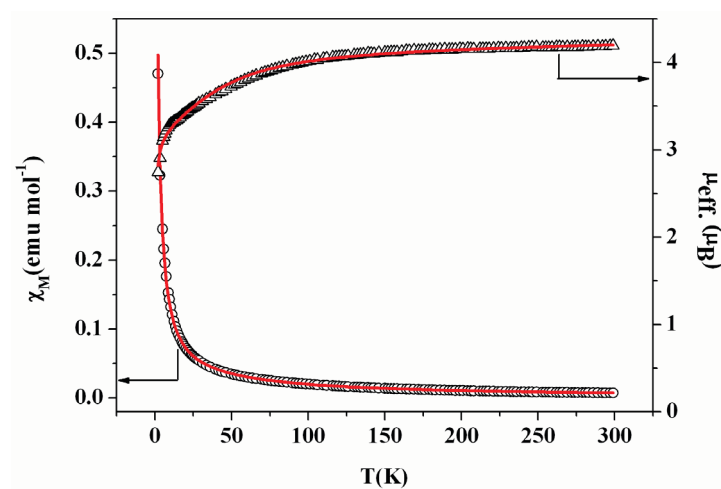

Supplement: s2 [file s2]
